# Supplementary material for: Synthesis and biological evaluation of S-simplexides and other analogues of simplexide
Source: publisher site journal article supplement (doi:10.1515/pac-2019-0218), 2019-07-01
Supplement: Supplementary file 1 [file pac-2019-0218_suppl.docx]

**Synthesis and biological evaluation of a simplexide from the marine sponge *Plakortis simplex* as well as *S*-simplexides and other analogues**

Amélie Roux,† Stefania Loffredo ‡, Anne Lise Ferrara ‡ and Paul V. Murphy*,†

† School of Chemistry, National University of Ireland Galway (NUI Galway), University Road, Galway, Ireland, H91 TK33

‡Department of Translational Medical Sciences and Center for Basic and Clinical Immunology Research (CISI), University of Naples Federico II, WAO Center of Excellence, Naples, Italy

*Email: [paul.v.murphy@nuigalway.ie](mailto:paul.v.murphy@nuigalway.ie)

**Supporting Information**

**Index**

Various NMR spectra for compounds **9-27** pp S2-S57

**Compound 9: 1H NMR, full spectrum**

**Compound 9: 1H NMR, expanded spectrum**

**Compound 9: 13C NMR**

**Compound 10: 1H NMR, full spectrum**

**Compound 10: 13C NMR**

**1H NMR, full spectrum of 12 (89% α, 11% β anomer)**

**Compound 12: 1H NMR, expanded spectrum**

**Compound 12: 13C NMR Spectrum**

**Compound 13 (83% α, 17% β): 1H NMR, full spectrum**

**Compound 13: 1H NMR, expanded spectrum**

**Compound 13: 13C NMR**

**Compound 14 (83:17 α-*S* isomer : β-*S* isomer): 1H-NMR, full spectrum**

**Compound 14: 1H NMR, expanded spectrum**

**Compound 14: 13C NMR**

**Compound 5 (-*S*-anomer) 1H NMR, full spectrum**

**Compound 5: 1H NMR, expanded spectrum**

**Compound 5: 13C NMR**

**Compound 20: 1H NMR, full spectrum**

**Compound 20: 1H NMR, expanded spectrum**

**Compound 20: 13C NMR**

**Compound 21 (85 α : 15 β, mixture of glucopyranosides: 1H NMR, full spectrum**

**Compound 21: 1H NMR, expanded spectrum**

**Compound 21: 13C NMR**

**Compound 1a 1H NMR, full spectrum**

**Compound 1a: 1H NMR, expanded spectrum**

**Compound 1a: 13C NMR**

**Compound 2 (84%α & 16% β glucopyranoside): 1H NMR, full spectrum**

**Compound 2: 1H NMR, expanded spectrum**

**Compound 2: 13C NMR**

**Compound 22β (74:26 mixture of  glucopyranosides) 1H NMR, full spectrum**

**Compound 22β: 1H NMR, expanded spectrum**

**Compound 22β: 13C NMR**

**Compound 22α (80:20 mixture of of  glucopyranosides) 1H NMR, full spectrum**

**Compound 22α: 1H NMR, expanded spectrum**

**Compound 22α: 13C NMR**

**Compound 25β (80:20 mixture of  glucopyranosides) 1H NMR, full spectrum**

**Compound 25β: 1H NMR, expanded spectrum**

**Compound 25β: 13C NMR**

**Compound 25α (83:17 mixture of  glucopyranosides) 1H NMR, full spectrum**

**Compound 25α: 1H NMR, expanded spectrum**

**Compound 25α: 13C NMR**

**Compound 6 (77% α : 23% β glucopyranosides): 1H NMR, full spectrum**

**Compound 6: 1H NMR, expanded spectrum**

**Compound 6: 13C NMR**

**Compound 26α 1H NMR, full spectrum**

**Compound 26α: 1H NMR, expanded spectrum**

**Compound 26α: 13C NMR**

**Compound 4 (90:10 mixture of β glucopyranosides): 1H NMR, full spectrum**

**Compound 4: 1H NMR, expanded spectrum**

**Compound 4: 13C NMR**

**Compound 27 (81%α: 19%β mixture of glucopyranosides): 1H NMR, full spectrum**

**Compound 27: 1H NMR, expanded spectrum**

**Compound 27: 13C NMR**

**Compound 3 (64% α : 36 %; mixture of glucopyranosides): 1H NMR, full spectrum**

**Compound 3: 1H NMR, expanded spectrum**

**Compound 3: 13C NMR**
